# Supplementary material for: Wild worm embryogenesis harbors ubiquitous polygenic modifier variation
Source: eLife. 2015 Aug 22;4:e09178. doi: 10.7554/eLife.09178 (PMC4569889; doi:10.7554/eLife.09178)
Supplement: Supplementary file 1. — Above the diagonal are the estimated correlations; below the diagonal are the correlation p-values; in green are pairs of genes with interactions reported in the literature. DOI: http://dx.doi.org/10.7554/eLife.09178.011 [file elife-09178-supp1.xlsx]

## Sheet: correlations and interactions
	aph-1	car-1	cdc-37	cdc-42	emb-30	fat-2	lag-1	lsy-22	mel-26	mel-28	mel-32	mex-3	mom-2	mom-5	nmy-2	par-1	par-2	par-3	par-4	par-5	par-6	pkc-3	pos-1	rfc-3	rpn-10	rpn-9	skn-1	skr-2	sur-6
aph-1		-0.446176	0.167532	-0.183694	0.306782	0.366955	-0.291847	-0.223593	-0.357215	-0.185786	0.0105339	-0.465873	0.285498	0.427056	-0.445238	-0.44798	-0.15873	-0.177345	0.348629	-0.340837	-0.334416	-0.149134	-0.546681	-0.0646465	0.438745	0.402381	0.329004	-0.0612554	-0.411616
car-1	0.000722284		-0.360823	0.51241	-0.542569	-0.420851	0.065368	0.317244	0.0100289	0.26075	-0.0356421	0.168543	-0.556205	-0.483478	0.77987	0.574603	0.423377	0.282612	-0.192424	0.457576	0.598268	-0.258802	0.372439	0.226912	-0.712915	-0.686219	-0.485137	0.160606	0.803896
cdc-37	0.220836	0.00709619		0.00750361	0.358442	0.259524	-0.30202	-0.122872	-0.393434	-0.102886	0.157431	-0.436941	0.338889	0.239322	-0.3614	-0.253102	-0.375902	0.118543	0.23355	-0.562987	-0.344156	-0.146898	-0.104834	0.147042	0.436869	0.305267	0.345094	0.310245	-0.322439
cdc-42	0.178979	8.02876e-05	0.9567		-0.450938	-0.000865801	-0.191414	0.35873	-0.209812	0.143362	0.184993	-0.121068	-0.353319	-0.298485	0.545815	0.269841	0.0613276	0.160173	-0.0930736	0.232323	0.343001	-0.206638	0.185714	0.382973	-0.47619	-0.440693	-0.146609	0.407937	0.568903
emb-30	0.0231014	2.55316e-05	0.00750535	0.000625078		0.233117	-0.0954545	-0.243723	-0.0529582	-0.0818182	-0.011039	-0.240837	0.597908	0.457071	-0.625036	-0.35368	-0.455988	-0.114574	0.127056	-0.691486	-0.519336	-0.0329726	-0.357071	0.144949	0.578932	0.617316	0.619192	0.0707071	-0.615368
fat-2	0.00613104	0.001509	0.0559584	0.995187	0.086819		-0.341126	-0.437951	-0.143506	-0.152814	0.206205	-0.0494949	0.139899	0.409452	-0.253247	-0.282107	-0.413636	-0.440043	0.251443	-0.431097	-0.290115	-0.123593	-0.524603	0.0379509	0.433911	0.286147	0.440548	0.094733	-0.27316
lag-1	0.0309907	0.634508	0.0254072	0.16116	0.487087	0.011154		0.435498	0.39899	0.110462	0.042785	0.0806638	0.0354978	-0.233189	0.0300866	0.221212	0.288817	0.275758	-0.129654	0.0593074	0.303102	0.0476912	0.44798	0.197835	-0.417172	-0.177922	-0.414358	0.0164502	0.100289
lsy-22	0.100788	0.0186526	0.370443	0.00745468	0.0731115	0.000922914	0.000991821		0.158802	0.114791	0.108514	-0.0106061	-0.0404762	-0.236869	0.303391	0.280808	0.193795	0.470707	-0.038961	0.157071	0.365079	-0.179221	0.458947	0.44632	-0.62583	-0.241342	-0.406277	0.267605	0.362121
mel-26	0.00772409	0.94208	0.0031632	0.124027	0.700249	0.29501	0.00273531	0.246105		0.182179	-0.180014	0.555916	-0.185931	-0.23254	-0.00699856	0.0231602	0.150794	-0.140476	-0.238745	0.16443	0.0926407	0.289466	0.131818	-0.158297	-0.217965	-0.0590188	-0.239899	-0.20368	0.0862915
mel-28	0.174013	0.0547772	0.453688	0.2955	0.551601	0.264544	0.420983	0.402919	0.182638		0.210462	0.0489177	-0.0365801	0.0104618	0.173232	0.371717	0.00339105	0.297619	-0.00468975	-0.0287157	0.269336	-0.206926	0.230375	0.285714	-0.406133	-0.32215	-0.0176046	0.235354	0.319986
mel-32	0.939158	0.795678	0.250246	0.175885	0.936236	0.130738	0.755859	0.429261	0.187959	0.122847		-0.0914863	-0.0701299	-0.0352814	-0.0101732	0.179942	0.00367965	0.0482684	0.169264	-0.110895	0.179293	-0.148341	-0.0371573	0.202381	-0.128139	0.0477633	-0.04329	0.236436	0.0994949
mex-3	0.000392166	0.218035	0.000950745	0.377551	0.0766573	0.719021	0.557245	0.93874	1.48943e-05	0.722166	0.50544		-0.329942	-0.26645	0.189899	0.103608	-0.0255411	-0.247547	-0.267749	0.349495	0.174603	0.288456	0.0487734	-0.325325	-0.196609	-0.126912	-0.152237	-0.191053	0.241703
mom-2	0.0349718	1.47185e-05	0.0117226	0.00845636	2.39765e-06	0.307414	0.796489	0.768666	0.173675	0.790417	0.609979	0.0142554		0.673016	-0.621212	-0.438312	-0.398629	0.0496392	0.0378788	-0.524964	-0.534632	-0.0765512	-0.00945166	0.13557	0.430664	0.488023	0.508658	0.233838	-0.523665
mom-5	0.0012659	0.000220568	0.078573	0.0272423	0.000517407	0.00206725	0.0867193	0.0817552	0.0876195	0.939575	0.797704	0.049552	5.68207e-08		-0.495743	-0.388384	-0.343001	-0.175108	-0.0037518	-0.365945	-0.472944	-0.0258297	-0.381385	0.0468254	0.475685	0.385281	0.566595	0.0729437	-0.42619
nmy-2	0.000742973	0	0.00699999	2.24359e-05	6.66866e-07	0.0623321	0.827019	0.0247242	0.959626	0.205355	0.941245	0.164549	8.02087e-07	0.00014517		0.560895	0.334704	0.262049	-0.187662	0.55303	0.565224	-0.25202	0.403824	0.219769	-0.729221	-0.74596	-0.549856	0.0700577	0.826118
par-1	0.000683958	6.7707e-06	0.0624852	0.0466423	0.0083861	0.0372674	0.10454	0.0381792	0.866468	0.00546325	0.188138	0.450514	0.000913154	0.00360285	1.21196e-05		0.447835	0.335786	-0.0769841	0.437951	0.505988	-0.219264	0.247258	0.199351	-0.605556	-0.630519	-0.334921	-0.0910534	0.623593
par-2	0.246322	0.00140541	0.00493022	0.655635	0.000535087	0.00184384	0.0328406	0.155938	0.27097	0.980539	0.978865	0.852866	0.00276144	0.0106957	0.0128541	0.000686955		0.160462	-0.282251	0.557576	0.495887	0.114141	0.156133	-0.091342	-0.437374	-0.491126	-0.531313	-0.223954	0.328499
par-3	0.194675	0.0369178	0.387638	0.242012	0.403812	0.000867592	0.041903	0.0003358	0.305407	0.0277084	0.72571	0.0686168	0.718235	0.200433	0.0535488	0.0125528	0.241156		-0.0408369	0.0435065	0.395382	-0.165657	0.585931	0.232395	-0.50469	-0.17518	-0.28961	0.221717	0.3443
par-4	0.00941764	0.158929	0.0862224	0.498057	0.35427	0.0642684	0.344454	0.777105	0.0793128	0.973008	0.216049	0.0484205	0.783148	0.978447	0.169648	0.575418	0.0371673	0.766661		-0.311977	-0.201948	-0.455123	-0.184921	0.141414	0.159596	0.24329	0.177056	0.0737374	-0.151876
par-5	0.011226	0.000509339	1.11044e-05	0.0879212	1.75335e-08	0.00112719	0.666301	0.251344	0.229599	0.834796	0.419156	0.00923332	5.04288e-05	0.00628158	1.67635e-05	0.000922914	1.39095e-05	0.75187	0.0207911		0.370418	0.24062	0.24733	-0.255916	-0.530447	-0.50974	-0.485137	-0.24228	0.49531
par-6	0.0129355	2.35833e-06	0.0104219	0.0106957	6.22455e-05	0.0320367	0.0248667	0.0064132	0.500065	0.0470665	0.189757	0.201749	3.48467e-05	0.000312311	1.01074e-05	0.000101205	0.000144445	0.00300682	0.139008	0.00563869		0.112987	0.258947	0.0989899	-0.692496	-0.508081	-0.514719	-0.0439394	0.576479
pkc-3	0.276325	0.0566628	0.283655	0.129919	0.810701	0.367623	0.728865	0.189938	0.0324366	0.129374	0.278911	0.0330668	0.577574	0.85122	0.0636436	0.10769	0.405599	0.226106	0.000549625	0.0769287	0.41039		-0.110895	-0.533983	0.155772	0.171573	-0.0101732	-0.359524	-0.316667
pos-1	2.16715e-05	0.00536787	0.445146	0.174183	0.00775019	5.11191e-05	0.000683958	0.000488014	0.336405	0.0906736	0.787184	0.722953	0.94542	0.00430155	0.00240582	0.0689481	0.254213	4.1185e-06	0.176056	0.0688651	0.0565213	0.419156		0.227561	-0.599856	-0.344877	-0.459163	0.316017	0.370851
rfc-3	0.63826	0.0957336	0.283178	0.00413334	0.290142	0.782745	0.147366	0.000719148	0.247626	0.0348294	0.13815	0.0157381	0.322738	0.733606	0.106866	0.144244	0.506114	0.0878206	0.302164	0.0595531	0.471038	3.57339e-05	0.0947684		-0.369264	-0.256638	0.0320346	0.666955	0.262626
rpn-10	0.000901565	0	0.000952762	0.000280875	5.60872e-06	0.00103885	0.00167224	6.41689e-07	0.10983	0.00226134	0.350159	0.14993	0.00114137	0.000285567	0	1.68384e-06	0.000938726	0.000106002	0.24373	4.09429e-05	1.62336e-08	0.255323	2.1925e-06	0.00579879		0.664719	0.541631	-0.253752	-0.775758
rpn-9	0.00250025	2.54377e-08	0.023815	0.000851044	9.66758e-07	0.034546	0.193208	0.0760271	0.667831	0.0168327	0.728471	0.35482	0.000189216	0.00389907	0	5.10573e-07	0.000170221	0.200245	0.0736349	8.84452e-05	9.38941e-05	0.20978	0.0102539	0.0588196	8.96914e-08		0.522006	-0.0573593	-0.717172
skn-1	0.0145464	0.000208609	0.0102039	0.28461	8.83787e-07	0.000854696	0.00180759	0.00225258	0.0778388	0.898352	0.753066	0.26637	9.19647e-05	9.53849e-06	1.9071e-05	0.0127933	3.96059e-05	0.0323474	0.195411	0.000208609	7.37978e-05	0.941245	0.000484722	0.815996	2.64972e-05	5.63534e-05		0.122583	-0.481097
skr-2	0.656014	0.240729	0.0215383	0.00215392	0.607034	0.490398	0.904999	0.0485452	0.135598	0.0837712	0.0823273	0.161962	0.0858264	0.595682	0.610348	0.507464	0.100228	0.103735	0.591676	0.0748677	0.74948	0.00731687	0.019133	7.94887e-08	0.0617984	0.67665	0.371575		0.200794
sur-6	0.00194884	0	0.0167305	8.64755e-06	1.0608e-06	0.0439321	0.465215	0.00688135	0.529993	0.0176159	0.468769	0.0755795	5.29551e-05	0.00129755	0	7.15095e-07	0.0147052	0.0103881	0.267515	0.000147366	6.24184e-06	0.0188774	0.00557967	0.0530101	0	0	0.000238824	0.141317
Above diagonal: correlations (Spearman Rank method) for the coefficients (from the generalized linear model) of every pair of genes
Below diagonal: pvalues for those correlations
In dark green: those pairs of genes for which wormbase.org reports evidence of a physical or genetic interaction
In light green: those pairs of genes for which wormbase.org reports evidence of a predicted interaction
